# Supplementary material for: Lysosomal calcium loading promotes spontaneous calcium release by potentiating ryanodine receptors
Source: PubMed Central journal article supplement (PMC10432190; doi:10.1016/j.bpj.2023.06.007), 2023-06-15
Supplement: mmc1.pdf [file mmc1.pdf]

**Biophysical Journal, Volume 122**

**Supplemental information**

**Lysosomal calcium loading promotes spontaneous calcium release by  
potentiating ryanodine receptors**

**Zhaozheng Meng, Rebecca A. Capel, Samuel J. Bose, Erik Bosch, Sophia de Jong, Robert  
Planque, Antony Galione, Rebecca A.B. Burton, and Alfonso Bueno-Orovio**

# Lysosomal calcium loading promotes spontaneous calcium release by potentiating ryanodine receptors

Zhaozheng Meng<sup>1</sup>, Rebecca A Capel<sup>1</sup>, Samuel J Bose<sup>1</sup>, Erik Bosch<sup>2</sup>, Sophia de Jong<sup>2</sup>, Robert Planque<sup>2</sup>, Antony Galione<sup>1</sup>, Rebecca AB Burton<sup>1\*</sup>, Alfonso Bueno-Orovio<sup>3\*</sup>

<sup>1</sup> Department of Pharmacology, University of Oxford, Oxford, UK

<sup>2</sup> Department of Mathematics, Vrije Universiteit Amsterdam, Netherlands

<sup>3</sup> Department of Computer Science, University of Oxford, Oxford, UK

address(es) of correspondence:

alfonso.bueno@cs.ox.ac.uk and rebecca.burton@pharm.ox.ac.uk

Running title: Modelling lysosomal calcium signalling in cardiac cells

## Supplementary Material

| Parameters                                    |                                                | Units      | Value        | Ref.       |
|-----------------------------------------------|------------------------------------------------|------------|--------------|------------|
| <b>Volume</b>                                 | Total cell ( $V_{tot}$ )                       | pL         | 33           | [1]        |
|                                               | Lysosome ( $V_{ls}$ )                          | pL         | 2% $V_{tot}$ | [2, 3]     |
| <b>TPC</b>                                    | Maximum open probability ( $P_{Omax}$ )        |            | 0.014        | [2, 4]     |
|                                               | Variance ( $P_{Osd}^2$ )                       |            | 2.25         | this study |
|                                               | Mean ( $P_{Omean}$ )                           |            | 23           | [2]        |
|                                               | Leak rate ( $j_{clc,leak}, j_{tpc,leak}$ )     | $s^{-1}$   | 1.13E-05     | this study |
| <b>Lysosome</b>                               | TPC flux density into junction ( $j_{clc}$ )   | $s^{-1}$   | 9.708        | this study |
|                                               | TPC flux density into cytosol ( $j_{tpc}$ )    | $s^{-1}$   | 12.135       | this study |
|                                               | [NAADP] for CTRL protocol                      | nM         | 1            | this study |
|                                               | [NAADP] for NAADP-AM protocol                  | nM         | 15           | this study |
|                                               | [NAADP] for ISO protocol                       | nM         | 15           | this study |
|                                               | Diffusion flux rate to junction ( $J_{ls,j}$ ) | $um^3/s$   | 1.4219E-15   | this study |
| Diffusion flux rate to cytosol ( $J_{ls,i}$ ) | $um^3/s$                                       | 1.3858E-15 | this study   |            |

**Table S1.** Baseline parameters for the lysosome compartment.

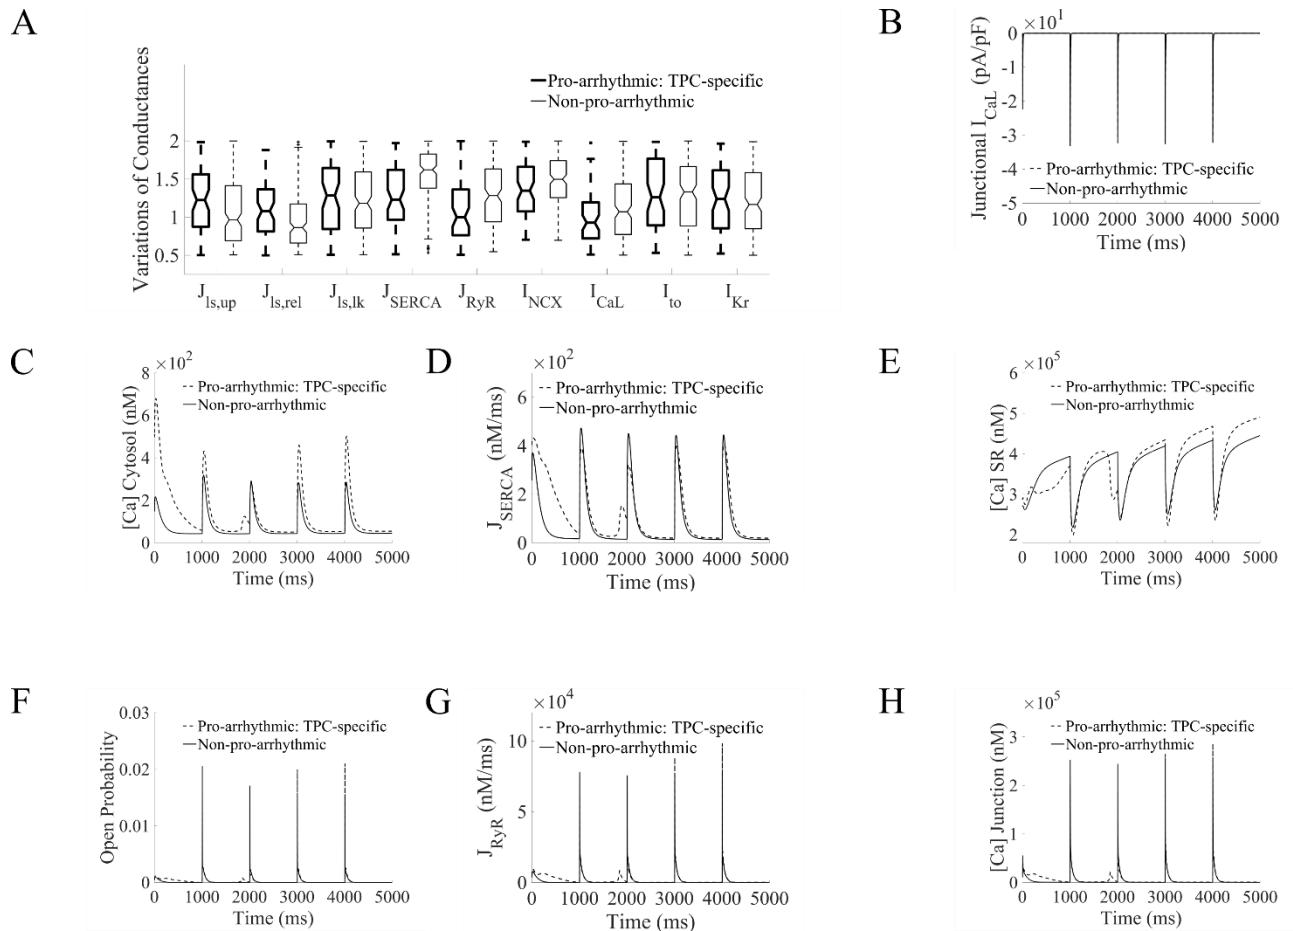

**Figure S1.** Ionic properties and calcium fluxes underlying spontaneous calcium events under fast pacing at 10 Hz and sustained  $\beta$ -adrenergic stimulation. **S1A:** Comparison of ionic properties of TPC-specific proarrhythmic models (blue), and non-proarrhythmic models (magenta) in WT. **S1B-S1H:** Traces of junctional L-type calcium current, cytosolic, SR and junctional calcium concentrations, SERCA and RyR fluxes, and RyR open probability, comparing TPC-specific pro-arrhythmic models, and non-proarrhythmic models in WT.

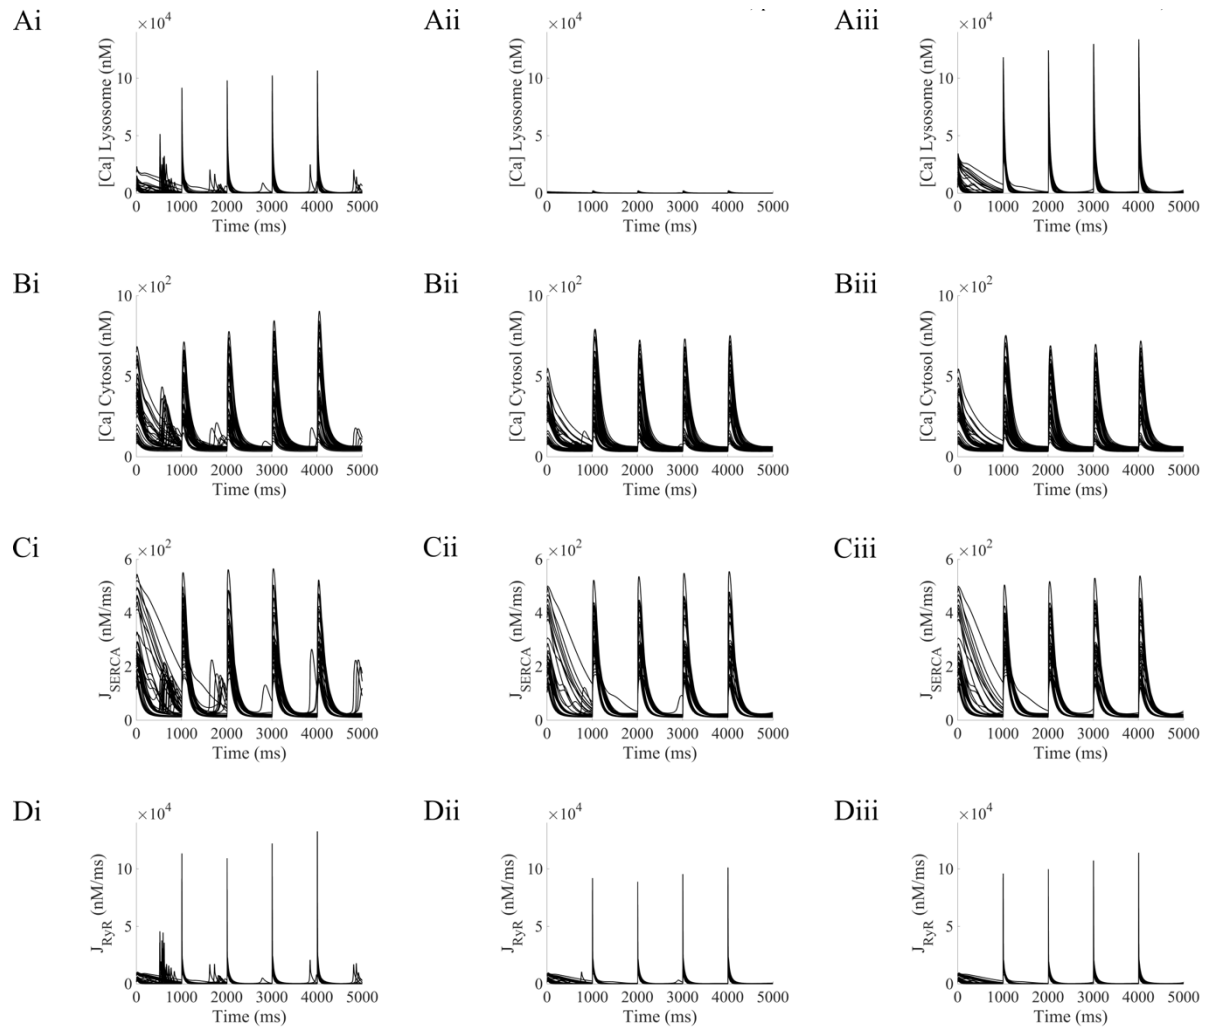

**Figure S2.** Lysosomal calcium release promotes spontaneous calcium release in TPC-specific pro-arrhythmic profiles under fast pacing and  $\beta$ -adrenergic stimulation, by increasing the junctional-SR calcium gradient. **S2Ai-S2Di:** Lysosomal calcium concentration, cytosolic calcium concentration, and SR reuptake and release fluxes, respectively, in basal conditions. **S2Aii-S2Dii:** Calcium concentrations and fluxes under lysosomal uptake block ( $J_{ls,up} = 0$ ). **S2Aiii-S2Diii:** Calcium concentrations and fluxes under lysosomal release block ( $J_{ls,rel} = 0$ ). All results presented under preliminary fast pacing at 25 Hz.

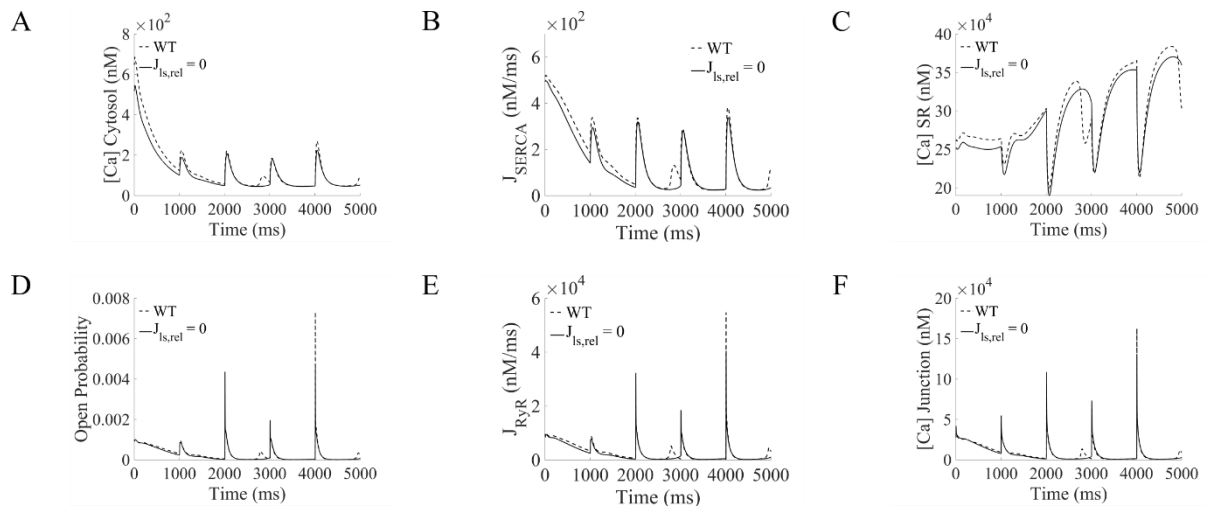

**Figure S3.** Loss of each lysosomal flux reduced spontaneous calcium release from SR in TPC-specific pro-arrhythmic models under fast pacing and  $\beta$ -adrenergic stimulation. **S3A-S3F:** Traces of cytosolic, SR and junctional calcium concentrations, SERCA and RyR fluxes, and RyR open probability, comparing scenarios in WT (blue), and blocking lysosomal calcium release ( $J_{Ls,rel} = 0$ , magenta). The beats presented in the results are at 1Hz following 25Hz fast pacing protocol.

### Supplemental References

1. Morotti, S., et al., *A novel computational model of mouse myocyte electrophysiology to assess the synergy between  $Na^+$  loading and CaMKII*. Journal of Physiology-London, 2014. **592**(6): p. 1181-1197.
2. Penny, C.J., et al., *A computational model of lysosome-ER  $Ca^{2+}$  microdomains*. Journal of Cell Science, 2014. **127**(13): p. 2934-2943.
3. Aston, D., et al., *High resolution structural evidence suggests the Sarcoplasmic Reticulum forms microdomains with Acidic Stores (lysosomes) in the heart*. Sci Rep, 2017. **7**: p. 40620.
4. Pitt, S.J., et al., *TPC2 Is a Novel NAADP-sensitive  $Ca^{2+}$  Release Channel, Operating as a Dual Sensor of Luminal pH and  $Ca^{2+}$* . Journal of Biological Chemistry, 2010. **285**(45): p. 35039-35046.
